# Supplementary material
Source: Research Square preprint supplement (doi:10.21203/rs.3.rs-10254891/v1)
Supplement: Supplementary file 1 [file 454225ce8933b2dd978ea3a9.docx]

# Measuring Effective Coverage for Facility Delivery using Health Facility and Household Surveys in Bangladesh, 2014 to 2022

**Supplementary tables:**

Table S1: Description of DHS and SPA samples

| **DHS Survey Year** | **Number of women who delivered in the facilities** | **Number of facilities with delivery service** |
| --- | --- | --- |
| 2014 | 3270 | 590 |
| 2017-18 | 3642 | 822 |
| 2022 | 3699 | 745 |

Table S2: Readiness tracer items

| **Mode of delivery** | **Domain** | **Tracer item** |
| --- | --- | --- |
| **Normal Delivery Care**  **(15 tracer items)** | Guideline | Guidelines for Integrated management of pregnancy and childbirth (IMPAC) |
| Trained human resource | Staff trained in IMPAC |
| Equipment | Emergency Transport |
| Examination light |
| Suction apparatus |
| Manual vacuum extractor |
| Vacuum aspirator or D&C kit |
| Newborn bag and mask |
| Partograph |
| Gloves |
| Medicine and commodities | Antibiotic eye ointment for newborn |
| Injectable uterotonic |
| injectable antibiotic |
| Magnesium sulphate |
| Intravenous solution with infusion sets |
| **Caesarean Delivery Care**  **(15 tracer items + additional 7 tracer items)** | Guideline | Guideline for CEmOC |
| Trained human resource | Staff trained in CEmOC |
| Surgeon/anesthetist |
| Equipment | Anesthetic equipment |
| External heat source |
| Diagnostic | Blood typing capacity |
| Medicine and commodities | No shortage of blood in last three months; blood obtained ONLY from national or regional blood bank OR blood obtained from other sources but screened for HIV and other transfusion transmissible infections |

Table S3: Coverage of crude and effective by sociodemographic characteristics in Bangladesh

| **Background Characteristics** | 2014 | | 2017 | | 2022 | |
| --- | --- | --- | --- | --- | --- | --- |
|  | Crude coverage | Effective coverage | Crude coverage | Effective coverage | Crude coverage | Effective coverage |
| **Wealth index** | | | | | | |
| Poorest | 14 | 9 | 27 | 15 | 42 | 22 |
| Poorer | 22 | 12 | 39 | 21 | 55 | 28 |
| Middle | 35 | 20 | 49 | 27 | 68 | 34 |
| Richer | 47 | 28 | 63 | 34 | 75 | 38 |
| Richest | 72 | 41 | 79 | 42 | 87 | 44 |
| **Division** | | | | | | |
| Barishal | 29 | 16 | 43 | 23 | 51 | 26 |
| Chattogram | 36 | 22 | 48 | 26 | 61 | 34 |
| Dhaka | 41 | 22 | 58 | 31 | 71 | 38 |
| Khulna | 56 | 33 | 62 | 30 | 82 | 33 |
| Mymensingh | - | - | 38 | 22 | 54 | 28 |
| Rajshahi | 38 | 20 | 54 | 30 | 70 | 30 |
| Rangpur | 32 | 23 | 48 | 29 | 61 | 29 |
| Sylhet | 20 | 11 | 42 | 19 | 52 | 34 |
| **Place of residence** | | | | | | |
| Urban | 58 | 33 | 63 | 35 | 77 | 39 |
| Rural | 30 | 18 | 46 | 25 | 60 | 30 |
| **Education** | | | | | | |
| No education | 15 | 9 | 26 | 15 | 44 | 25 |
| Primary | 25 | 14 | 35 | 19 | 47 | 24 |
| Secondary | 43 | 25 | 53 | 28 | 67 | 34 |
| Higher | 74 | 42 | 79 | 43 | 87 | 43 |

Table S4: Percentage of women who gave birth in the health facilities in the two years preceding the survey, by sociodemographic characteristics in 2022

| **Background Characteristics** | **Public- Hospital** | **Public- Upazila Health Complex (UHC)** | **Public- Maternal and Child Welfare Center (MCWC)** | **Public- Union Health and Family Welfare Center (UnHFWC)** | **Public- Community Clinic** | **NGO- Hospital/Clinic** | **Private- Hospital** |
| --- | --- | --- | --- | --- | --- | --- | --- |
| **Wealth index** | | | | | | |  |
| Poorest | 7 | 7 | 1 | 2 | 1 | 1 | 24 |
| Poorer | 9 | 6 | 2 | 0 | 1 | 1 | 35 |
| Middle | 10 | 6 | 1 | 2 | 1 | 3 | 46 |
| Richer | 7 | 5 | 3 | 1 | 0 | 2 | 57 |
| Richest | 11 | 2 | 4 | 0 | 0 | 2 | 68 |
| **Division** | | | | | | |  |
| Barishal | 5 | 4 | 3 | 0 | 1 | 1 | 37 |
| Chattogram | 10 | 6 | 2 | 3 | 0 | 3 | 37 |
| Dhaka | 10 | 3 | 4 | 0 | 0 | 3 | 51 |
| Khulna | 9 | 7 | 1 | 1 | 0 | 1 | 64 |
| Mymensingh | 7 | 4 | 0 | 0 | 2 | 1 | 56 |
| Rajshahi | 6 | 7 | 1 | 2 | 1 | 0 | 44 |
| Rangpur | 8 | 10 | 2 | 1 | 0 | 2 | 29 |
| Sylhet | 9 | 7 | 2 | 0 | 0 | 1 | 35 |
| **Place of residence** | | | | | | |  |
| Urban | 11 | 4 | 4 | 1 | 0 | 3 | 55 |
| Rural | 8 | 6 | 1 | 1 | 1 | 1 | 42 |
| **Education** | | | | | | |  |
| No education | 13 | 4 | 1 | 1 | 1 | 2 | 23 |
| Primary | 7 | 5 | 1 | 1 | 0 | 2 | 31 |
| Secondary | 9 | 6 | 2 | 1 | 1 | 2 | 47 |
| Higher | 10 | 4 | 4 | 1 | 1 | 2 | 66 |
